# Supplementary material for: Megalencephalic leukoencephalopathy with subcortical cysts: a variant update and review of the literature
Source: PubMed Central journal article supplement (PMC10938252; doi:10.3389/fgene.2024.1352947), 2024-02-29
Supplement: Table1.pdf [file Table1.pdf]

*Supplementary Material for:*

**Megalencephalic Leukoencephalopathy with subcortical Cysts:  
A variant update and review of the literature**

Supplementary Table S1. *MLC1* variants found in MLC patients.

| Exon/<br>intron | DNA          | Protein           | Variant type | Pathogenicity     | References                                                                                  | Extra info                                                                                                                           |
|-----------------|--------------|-------------------|--------------|-------------------|---------------------------------------------------------------------------------------------|--------------------------------------------------------------------------------------------------------------------------------------|
| 1 (5'UTR)       | c.-195T>C    | p.?               | 5'UTR        | Likely pathogenic | This paper                                                                                  | Homozygously found in patient with radiological improvement. Discussed in sections 3.1.1 and 3.1.2                                   |
| 1 (5'UTR)       | c.-190A>G    | p.?               | 5'UTR        | Likely pathogenic | This paper                                                                                  | Heterozygously found in combination with c.178-10T>A in patient with radiological improvement. Discussed in sections 3.1.1 and 3.1.2 |
| 2 (5'UTR)       | c.-42C>T     | p.?               | 5'UTR        | Likely pathogenic | (Kariminejad et al., 2015)                                                                  | Previously reported as c.42C>T                                                                                                       |
| 2               | c.65G>A      | p.(Arg22Gln)      | Missense     | Likely pathogenic | (Wang et al., 2011; van der Knaap et al., 2012; Cao et al., 2016)                           |                                                                                                                                      |
| 2               | c.67C>T      | p.(Gln23*)        | Nonsense     | Pathogenic        | This paper                                                                                  |                                                                                                                                      |
| 2               | c.109delC    | p.(Leu37Cysfs*21) | Frameshift   | Likely pathogenic | (Montagna et al., 2006; van der Knaap et al., 2012)                                         |                                                                                                                                      |
| 2               | c.111_112dup | p.(Gln38Argfs*21) | Frameshift   | Pathogenic        | (Boor et al., 2006)                                                                         | Previously reported as c.110insGC                                                                                                    |
| 2               | c.135del     | p.(Cys46Alafs*12) | Frameshift   | Pathogenic        | (van der Knaap et al., 2012; Kariminejad et al., 2015; Choi et al., 2017; Dai et al., 2017) | Previously reported as c.135delC                                                                                                     |
| 2               | c.135dup     | p.(Cys46Leufs*34) | Frameshift   | Pathogenic        | (Ben-Zeev et al., 2002; Leegwater et al., 2002; Gorospe et al., 2004; Shukla et al., 2008;  | Previously reported as c.135insC. Discussed in section 3.1                                                                           |

|      |              |                    |                         |                                 |                                                                                                                                              |                                                                                                                                  |
|------|--------------|--------------------|-------------------------|---------------------------------|----------------------------------------------------------------------------------------------------------------------------------------------|----------------------------------------------------------------------------------------------------------------------------------|
|      |              |                    |                         |                                 | Shukla et al., 2011; Saini et al., 2015)                                                                                                     |                                                                                                                                  |
| 2    | c.136del     | p.(Cys46Alafs*12)  | Frameshift              | Pathogenic                      | (Jerbi Omezzine et al., 2008; Tinsa et al., 2009; Kariminejad et al., 2015)                                                                  | Previously reported as c.136delT                                                                                                 |
| 2    | c.176G>A     | p.(Gly59Glu)       | Missense                | Pathogenic                      | (Ben-Zeev et al., 2002; van der Knaap et al., 2012)                                                                                          | Functional experiments show intermediate reduction in plasma membrane expression (Duarri et al., 2008). Discussed in section 3.1 |
| 2    | c.177G>A     | p.?                | Splice defect predicted | Likely pathogenic               | This paper                                                                                                                                   |                                                                                                                                  |
| IVS2 | c.177+1del   | p.?                | Frameshift              | Likely pathogenic               | (Patrono et al., 2003)                                                                                                                       | Previously reported as c.177_178delG/c.177delG                                                                                   |
| IVS2 | c.177+1G>T   | p.?                | Splice defect           | Likely pathogenic               | (Patrono et al., 2003; van der Knaap et al., 2012; Kariminejad et al., 2015)                                                                 |                                                                                                                                  |
| IVS2 | c.178-10T>A  | p.?                | Splice defect           | Pathogenic                      | (van der Knaap et al., 2012) (Boor et al., 2006; Cao et al., 2016)                                                                           | Heterozygously found in combination with c.-190A>G in patient with radiological improvement. Discussed in section 3.1.2          |
| IVS2 | c.178-2A>G   | p.?                | Splice defect           | Likely pathogenic               | This paper                                                                                                                                   |                                                                                                                                  |
| 3    | r.178_267del | p.(Ser60_Ser89del) | In frame deletion       | Pathogenic                      | This paper                                                                                                                                   | MLPA, cDNA                                                                                                                       |
| 3    | c.184C>T     | p.(Leu62Phe)       | Missense                | Variant of unknown significance |                                                                                                                                              |                                                                                                                                  |
| 3    | c.206C>T     | p.(Ser69Leu)       | Missense                | Pathogenic                      | (Boor et al., 2006; Lopez-Hernandez et al., 2011; Wang et al., 2011; Yuzbasioglu et al., 2011; van der Knaap et al., 2012; Cao et al., 2016) |                                                                                                                                  |
| 3    | c.213C>G     | p.(Tyr71*)         | Nonsense                | Likely pathogenic               | (Leegwater et al., 2001; van der Knaap et al., 2012)                                                                                         |                                                                                                                                  |

|   |          |              |          |                                 |                                                                                                   |                                                                                                  |
|---|----------|--------------|----------|---------------------------------|---------------------------------------------------------------------------------------------------|--------------------------------------------------------------------------------------------------|
| 3 | c.218G>A | p.(Gly73Glu) | Missense | Likely pathogenic               | (Wang et al., 2011; van der Knaap et al., 2012; Cao et al., 2016)                                 |                                                                                                  |
| 3 | c.235G>A | p.(Glu79Lys) | Missense | Variant of unknown significance | (Yuzbasioglu et al., 2011; van der Knaap et al., 2012)                                            |                                                                                                  |
| 3 | c.238A>G | p.(Met80Val) | Missense | Likely pathogenic               | (Montagna et al., 2006; van der Knaap et al., 2012)                                               | Previously reported as c.237A>G                                                                  |
| 3 | c.240G>A | p.(Met80Ile) | Missense | Likely pathogenic               | (Boor et al., 2006; van der Knaap et al., 2012)                                                   |                                                                                                  |
| 3 | c.249G>T | p.(Leu83Phe) | Missense | Pathogenic                      | (Leegwater et al., 2002; Patrono et al., 2003; Montagna et al., 2006; van der Knaap et al., 2012) | Functional experiments show severe reduction in plasma membrane expression (Duarri et al., 2008) |
| 3 | c.250C>A | p.(Arg84Ser) | Missense | Pathogenic                      | (Kariminejad et al., 2015)                                                                        |                                                                                                  |
| 3 | c.250C>T | p.(Arg84Cys) | Missense | Pathogenic                      | (Boor et al., 2006; van der Knaap et al., 2012; Brozova et al., 2019)                             |                                                                                                  |
| 3 | c.251G>A | p.(Arg84His) | Missense | Pathogenic                      | (Riel-Romero et al., 2005; van der Knaap et al., 2012)                                            |                                                                                                  |
| 3 | c.254G>A | p.(Cys85Tyr) | Missense | Likely pathogenic               | (Yuzbasioglu et al., 2011)                                                                        |                                                                                                  |
| 3 | c.255T>G | p.(Cys85Trp) | Missense | Likely pathogenic               | (Leegwater et al., 2002; van der Knaap et al., 2012)                                              | Functional experiments show severe reduction in plasma membrane expression (Duarri et al., 2008) |
| 3 | c.263G>T | p.(Gly88Val) | Missense | Likely pathogenic               | (Patrono et al., 2003; Koussa et al., 2005)                                                       | Functional experiments show severe reduction in plasma membrane expression (Duarri et al., 2008) |

|      |              |                     |                   |                                 |                                                                                                                                                                                                                                                                                                                    |                                                                                                                                                             |
|------|--------------|---------------------|-------------------|---------------------------------|--------------------------------------------------------------------------------------------------------------------------------------------------------------------------------------------------------------------------------------------------------------------------------------------------------------------|-------------------------------------------------------------------------------------------------------------------------------------------------------------|
| IVS3 | c.267+1G>C   | p.?                 | Splice defect     | Likely pathogenic               | (Yuzbasioglu et al., 2011; van der Knaap et al., 2012)                                                                                                                                                                                                                                                             |                                                                                                                                                             |
| IVS3 | c.268-1G>A   | p.?                 | Splice defect     | Pathogenic                      | (Boor et al., 2006; van der Knaap et al., 2012)                                                                                                                                                                                                                                                                    |                                                                                                                                                             |
| IVS3 | c.268-23A>G  | p.?                 | Splice defect     | Pathogenic                      | This paper                                                                                                                                                                                                                                                                                                         |                                                                                                                                                             |
| 4    | c.268_422del | p.(Cys90Hisfs*39)   | Frameshift        | Pathogenic                      | (Leegwater et al., 2002; van der Knaap et al., 2012)                                                                                                                                                                                                                                                               |                                                                                                                                                             |
| 4+5  | c.268_423del | p.(Cys90_Asn141del) | In frame deletion | Variant of unknown significance | This paper                                                                                                                                                                                                                                                                                                         |                                                                                                                                                             |
| 4    | c.268T>G     | p.(Cys90Gly)        | Missense          | Variant of unknown significance | (Kariminejad et al., 2015)                                                                                                                                                                                                                                                                                         |                                                                                                                                                             |
| 4    | c.274C>T     | p.(Pro92Ser)        | Missense          | Pathogenic                      | (Ben-Zeev et al., 2002; Leegwater et al., 2002; Montagna et al., 2006; Yuzbasioglu et al., 2011; van der Knaap et al., 2012)                                                                                                                                                                                       | Functional experiments show intermediate reduction in plasma membrane expression (Duarri et al., 2008; Capdevila-Nortes et al., 2013)                       |
| 4    | c.278C>G     | p.(Ser93Trp)        | Missense          | Variant of unknown significance | This paper                                                                                                                                                                                                                                                                                                         |                                                                                                                                                             |
| 4    | c.278C>T     | p.(Ser93Leu)        | Missense          | Pathogenic                      | (Leegwater et al., 2001; Saijo et al., 2003; Tsujino et al., 2003; Itoh et al., 2006; Montagna et al., 2006; Morita et al., 2006; Kiriya et al., 2007; Koyama et al., 2012; van der Knaap et al., 2012; Shimada et al., 2014; Kariminejad et al., 2015; Masuda et al., 2015; Abdel-Salam et al., 2016; Cao et al., | Previously reported as c.277C>T. Functional experiments show severe reduction in plasma membrane expression (Duarri et al., 2008). Discussed in section 3.1 |

|      |                  |                    |                                |                                 |                                                                                                                                                                 |                                                                                                                        |
|------|------------------|--------------------|--------------------------------|---------------------------------|-----------------------------------------------------------------------------------------------------------------------------------------------------------------|------------------------------------------------------------------------------------------------------------------------|
|      |                  |                    |                                |                                 | 2016; Ain Ul Batool et al., 2022)                                                                                                                               |                                                                                                                        |
| 4+5  | c.299_423+108del | p.(Val100Aspfs*73) | Frameshift                     | Pathogenic                      | (Boor et al., 2006; van der Knaap et al., 2012)                                                                                                                 |                                                                                                                        |
| IVS4 | c.321+2T>G       | p.?                | Splice defect                  | Likely pathogenic               | This paper                                                                                                                                                      |                                                                                                                        |
| IVS4 | c.321+6T>G       | p.?                | Splice defect                  | Pathogenic                      | This paper                                                                                                                                                      |                                                                                                                        |
| IVS4 | c.322-1G>A       | p.?                | Splice defect                  | Likely pathogenic               | (Miles et al., 2009; van der Knaap et al., 2012)                                                                                                                |                                                                                                                        |
| IVS4 | c.322-2A>G       | p.?                | Splice defect                  | Likely pathogenic               | (Yuzbasioglu et al., 2011; van der Knaap et al., 2012)                                                                                                          |                                                                                                                        |
| IVS4 | c.322-6T>C       | p.?                | Subtle splice defect predicted | Variant of unknown significance | (Kariminejad et al., 2015)                                                                                                                                      |                                                                                                                        |
| 5    | c.324del         | p.(Asn110Thrfs*12) | Frameshift                     | Pathogenic                      | (Montagna et al., 2006; van der Knaap et al., 2012)                                                                                                             | Previously reported as c.323delT and c.324delT                                                                         |
| 5    | c.337_353delinsG | p.(Ile113Glyfs*4)  | Frameshift                     | Pathogenic                      | (Choi et al., 2017)                                                                                                                                             |                                                                                                                        |
| 5    | c.344T>C         | p.(Phe115Ser)      | Missense                       | Variant of unknown significance | (Amin et al., 2022)                                                                                                                                             |                                                                                                                        |
| 5    | c.353C>G         | p.(Thr118Arg)      | Missense                       | Pathogenic                      | (Leegwater et al., 2001; Yis et al., 2010; Wang et al., 2011; Yuzbasioglu et al., 2011; van der Knaap et al., 2012; Kariminejad et al., 2015; Cao et al., 2016) | Functional experiments show severe reduction in plasma membrane expression (Duarri et al., 2008)                       |
| 5    | c.353C>T         | p.(Thr118Met)      | Missense                       | Pathogenic                      | (van der Knaap et al., 2012)                                                                                                                                    | Functional experiments show severe reduction in plasma membrane expression (Teijido et al., 2004; Duarri et al., 2008) |
| 5    | c.359C>T         | p.(Ala120Val)      | Missense                       | Variant of unknown significance | (Yuzbasioglu et al., 2011; van der Knaap et al., 2012)                                                                                                          |                                                                                                                        |

|      |            |                    |               |                                 |                                                                                                                                                                                                                                                   |                                                                                                      |
|------|------------|--------------------|---------------|---------------------------------|---------------------------------------------------------------------------------------------------------------------------------------------------------------------------------------------------------------------------------------------------|------------------------------------------------------------------------------------------------------|
| 5    | c.357dup   | p.(Ala120Cysfs*61) | Frameshift    | Likely pathogenic               | (Patrono et al., 2003)                                                                                                                                                                                                                            | Previously reported as c.357insT                                                                     |
| 5    | c.373T>C   | p.(Cys125Arg)      | Missense      | Likely pathogenic               | (Leegwater et al., 2002; van der Knaap et al., 2012)                                                                                                                                                                                              | Functional experiments show severe reduction in plasma membrane expression (Duarri et al., 2008)     |
| 5    | c.387delT  | p.(Phe129Leufs*5)  | Frameshift    | Likely pathogenic               | This paper                                                                                                                                                                                                                                        |                                                                                                      |
| 5    | c.388G>A   | p.(Gly130Arg)      | Missense      | Variant of unknown significance | (Montagna et al., 2006; van der Knaap et al., 2012)                                                                                                                                                                                               | Previously reported as c.387G>A                                                                      |
| 5    | c.422A>G   | p.(Asn141Ser)      | Missense      | Likely pathogenic               | (Leegwater et al., 2002; Yuzbasioglu et al., 2011; van der Knaap et al., 2012)                                                                                                                                                                    | Functional experiments show severe reduction in plasma membrane expression (Duarri et al., 2008)     |
| 5    | c.423C>A   | p.(Asn141Lys)      | Missense      | Variant of unknown significance | (Leegwater et al., 2002; Patrono et al., 2003; van der Knaap et al., 2012)                                                                                                                                                                        | Functional experiments show mild to no reduction in plasma membrane expression (Duarri et al., 2008) |
| IVS5 | c.423+1G>A | p.?                | Splice defect | Likely pathogenic               | (De Stefano et al., 2001; Leegwater et al., 2002; Bugiani et al., 2003; Patrono et al., 2003; Rubie et al., 2003; Riel-Romero et al., 2005; van der Knaap et al., 2012; Rossi et al., 2014; Kariminejad et al., 2015; Khalaf-Nazzal et al., 2022) |                                                                                                      |
| IVS5 | c.423+1G>T | p.?                | Splice defect | Likely pathogenic               | This paper                                                                                                                                                                                                                                        |                                                                                                      |
| IVS5 | c.423+2dup | p.?                | Splice defect | Pathogenic                      | (Leegwater et al., 2001; Yuzbasioglu et al., 2011; van der Knaap et al., 2012; Dai et al., 2017)                                                                                                                                                  | Previously reported as c.423+2dupT and c.423+3_423+4insT                                             |

|      |              |                      |                         |                                 |                                                                                                          |                                                                                                        |
|------|--------------|----------------------|-------------------------|---------------------------------|----------------------------------------------------------------------------------------------------------|--------------------------------------------------------------------------------------------------------|
| IVS5 | c.423+6T>C   | p.?                  | Splice defect predicted | Variant of unknown significance | (Yuzbasioglu et al., 2011; van der Knaap et al., 2012)                                                   | Previously reported as c.585C>A                                                                        |
| IVS5 | c.423+6T>G   | p.?                  | Splice defect predicted | Variant of unknown significance | (Patrono et al., 2003; Yuzbasioglu et al., 2011)                                                         |                                                                                                        |
| 6+7  | c.424_597del | p.(Ile142_Ser199del) | in frame deletion       | Variant of unknown significance | This paper                                                                                               | MLPA                                                                                                   |
| IVS5 | c.424-2A>G   | p.?                  | Splice defect           | Likely pathogenic               | This paper                                                                                               |                                                                                                        |
| IVS5 | c.424-3C>G   | p.?                  | Splice defect           | Pathogenic                      | This paper                                                                                               |                                                                                                        |
| 6    | c.448del     | p.(Leu150Serfs*11)   | Frameshift              | Pathogenic                      | (Shariati et al., 2015; Soysal et al., 2015)                                                             | Previously reported as c.448delC                                                                       |
| 6    | c.449_455del | p.(Leu150Argfs*9)    | Frameshift              | Pathogenic                      | (Leegwater et al., 2001; Yuzbasioglu et al., 2011; van der Knaap et al., 2012; Kariminejad et al., 2015) |                                                                                                        |
| 6    | c.452_467del | p.(Leu151Argfs*5)    | Frameshift              | Likely pathogenic               | (Tsuji et al., 2003)                                                                                     | Previously reported as c.452-468del+g                                                                  |
| 6    | c.459delG    | p.(Glu153Aspfs*8)    | Frameshift              | Likely pathogenic               | (Kariminejad et al., 2015)                                                                               | Previously reported as c.459delG                                                                       |
| 6    | c.456_460dup | p.(Leu154Argfs*9)    | Frameshift              | Likely pathogenic               | (Leegwater et al., 2001)                                                                                 | Previously reported as c.460insGGAGC                                                                   |
| 6    | c.470C>A     | p.(Ala157Glu)        | Missense                | Pathogenic                      | (Rubie et al., 2003; Gorospe et al., 2004; van der Knaap et al., 2012)                                   | Functional experiments show intermediate reduction in plasma membrane expression (Duarri et al., 2008) |
| 6    | c.514_515del | p.(Lys172Glufs*8)    | Frameshift              | Pathogenic                      | (Montagna et al., 2006; van der Knaap et al., 2012)                                                      |                                                                                                        |
| 7    | c.578delG    | p.(Val194Serfs*2)    | Frameshift              | Pathogenic                      | (Shimada et al., 2014)                                                                                   |                                                                                                        |
| 7    | c.594_597del | p.(Tyr198*)          | Nonsense                | Pathogenic                      | (Leegwater et al., 2001; Shukla et al., 2011; Wang et al., 2011;                                         | previously reported as c.593_596del and c.709-712del                                                   |



|      |                   |                    |               |                                    |                                                                               |                                                                                                                                                             |
|------|-------------------|--------------------|---------------|------------------------------------|-------------------------------------------------------------------------------|-------------------------------------------------------------------------------------------------------------------------------------------------------------|
|      |                   |                    |               |                                    | Yuzbasioglu et al., 2011;<br>van der Knaap et al.,<br>2012; Cao et al., 2016) |                                                                                                                                                             |
| 7    | c.595T>C          | p.(Ser199Pro)      | Missense      | Variant of unknown<br>significance | This paper                                                                    |                                                                                                                                                             |
| 7    | c.596C>T          | p.(Ser199Leu)      | Missense      | Variant of unknown<br>significance | This paper                                                                    |                                                                                                                                                             |
| 7    | c.596_597+2del    | p.(Ser199Cysfs*22) | Frameshift    | Likely pathogenic                  | (Cao et al., 2016)                                                            | Previously reported as<br>c.596delCAgt                                                                                                                      |
| IVS7 | c.597+1G>A        | p.?                | Splice defect | Pathogenic                         | (Boor et al., 2006; Miles<br>et al., 2009; van der<br>Knaap et al., 2012)     |                                                                                                                                                             |
| IVS7 | c.597+1_597+34del | p.?                | Splice defect | Likely pathogenic                  | (Boor et al., 2006; van<br>der Knaap et al., 2012)                            | previously reported as<br>c.597delA+33 and<br>c.597_598delA+33 and<br>c.597_597+33del / p.Gly206X and<br>p.Val200Serfs*4                                    |
| IVS7 | c.597+37C>G       | p.?                | Splice defect | Likely pathogenic                  | This paper                                                                    | Discussed in sections 3.1.1 and<br>3.1.4                                                                                                                    |
| IVS7 | c.598-1G>A        | p.?                | Splice defect | Likely pathogenic                  | This paper                                                                    |                                                                                                                                                             |
| IVS7 | c.598-2A>C        | p.?                | Splice defect | Likely pathogenic                  | (Cao et al., 2016)                                                            |                                                                                                                                                             |
| IVS7 | c.598-2A>G        | p.?                | Splice defect | Likely pathogenic                  | This paper                                                                    |                                                                                                                                                             |
| IVS7 | c.598-753A>G      | p.?                | Frameshift    | Variant of unknown<br>significance | This paper                                                                    |                                                                                                                                                             |
| 8    | c.604G>A          | p.(Glu202Lys)      | Missense      | Pathogenic                         | (Montagna et al., 2006;<br>van der Knaap et al.,<br>2012)                     | Previously reported as c.603G>A.<br>Functional experiments show<br>reduction in protein levels and<br>plasma membrane expression<br>(Montagna et al., 2006) |
| 8    | c.606G>C          | p.(Glu202Asp)      | Missense      | Likely pathogenic                  | (Cao et al., 2016)                                                            |                                                                                                                                                             |
| 8    | c.629T>A          | p.(Val210Asp)      | Missense      | Pathogenic                         | (Leegwater et al., 2002;<br>van der Knaap et al.,<br>2012)                    | Functional experiments show<br>severe reduction in plasma                                                                                                   |

|      |                  |                    |                         |                                 |                                                                                                  |                                                                                                                        |
|------|------------------|--------------------|-------------------------|---------------------------------|--------------------------------------------------------------------------------------------------|------------------------------------------------------------------------------------------------------------------------|
|      |                  |                    |                         |                                 |                                                                                                  | membrane expression (Duarri et al., 2008)                                                                              |
| 8    | c.634G>A         | p.(Gly212Arg)      | Missense                | Pathogenic                      | (Leegwater et al., 2001; Yuzbasioglu et al., 2011; van der Knaap et al., 2012; Cao et al., 2016) | Functional experiments show severe reduction in plasma membrane expression (Teijido et al., 2004; Duarri et al., 2008) |
| 8    | c.635G>A         | p.(Gly212Glu)      | Missense                | Pathogenic                      | (Leegwater et al., 2002; van der Knaap et al., 2012)                                             | Functional experiments show severe reduction in plasma membrane expression (Duarri et al., 2008)                       |
| 8    | c.640_641insG    | p.(Ile214Serfs*8)  | Frameshift              | Likely pathogenic               | This paper                                                                                       | Previously reported as c.640insG                                                                                       |
| 8    | c.701G>A         | p.(Trp234*)        | Nonsense                | Pathogenic                      | (Kariminejad et al., 2015)                                                                       |                                                                                                                        |
| 8    | c.710T>A         | p.(Val237Glu)      | Missense                | Pathogenic                      | This paper                                                                                       |                                                                                                                        |
| IVS8 | c.714+1G>A       | p.?                | Splice defect           | Pathogenic                      | (Boor et al., 2006; van der Knaap et al., 2012)                                                  |                                                                                                                        |
| IVS8 | c.714+3G>A       | p.?                | Splice defect predicted | Variant of unknown significance | This paper                                                                                       | MLPA                                                                                                                   |
| IVS8 | c.714+3G>C       | p.?                | Splice defect           | Likely pathogenic               | This paper                                                                                       |                                                                                                                        |
| IVS8 | c.714+5G>C       | p.?                | Splice defect predicted | Likely pathogenic               | This paper                                                                                       |                                                                                                                        |
| 9    | c.727G>A         | p.(Ala243Thr)      | Missense                | Variant of unknown significance | This paper                                                                                       |                                                                                                                        |
| 9    | c.733G>C         | p.(Ala245Pro)      | Missense                | Pathogenic                      | (Boor et al., 2006; van der Knaap et al., 2012)                                                  | Functional experiments show severe reduction in plasma membrane expression (Duarri et al., 2008)                       |
| 9    | c.734_735delinsG | p.(Ala245Glyfs*17) | Frameshift              | Likely pathogenic               | This paper                                                                                       |                                                                                                                        |
| 9    | c.736del         | p.(Ser246Valfs*16) | Frameshift              | Pathogenic                      | (Kariminejad et al., 2015; Vellarikkal et al., 2018)                                             |                                                                                                                        |

|      |            |                    |               |                                 |                                                                                                                                      |                                                                                                                                                                                          |
|------|------------|--------------------|---------------|---------------------------------|--------------------------------------------------------------------------------------------------------------------------------------|------------------------------------------------------------------------------------------------------------------------------------------------------------------------------------------|
| 9    | c.736A>C   | p.(Ser246Arg)      | Missense      | Likely pathogenic               | (Leegwater et al., 2002; van der Knaap et al., 2012)                                                                                 | Homozygously found in patients with radiological improvement. Functional experiments show mild reduction in plasma membrane expression (Duarri et al., 2008). Discussed in section 3.1.1 |
| 9    | c.754dup   | p.(Cys252Leufs*40) | Frameshift    | Pathogenic                      | This paper                                                                                                                           | Previously reported as c.754_755insT                                                                                                                                                     |
| 9    | c.762C>T   | p.(=)              | Splice defect | Variant of unknown significance | (Amin et al., 2022)                                                                                                                  |                                                                                                                                                                                          |
| IVS9 | c.771+2T>C | p.?                | Splice defect | Likely pathogenic               | (Turkyilmaz et al., 2019)                                                                                                            | Previously reported as c.768+2T>C, skip of exon 9                                                                                                                                        |
| IVS9 | c.771+5G>C | p.?                | Splice defect | Pathogenic                      | This paper                                                                                                                           |                                                                                                                                                                                          |
| IVS9 | c.772-1G>C | p.?                | Splice defect | Likely pathogenic               | (De Stefano et al., 2001; Patrono et al., 2003; Wang et al., 2011; van der Knaap et al., 2012; Rossi et al., 2014; Cao et al., 2016) |                                                                                                                                                                                          |
| 10   | c.793del   | p.(Ser265Alafs*20) | Frameshift    | Likely pathogenic               | (Shukla et al., 2011; van der Knaap et al., 2012)                                                                                    | Previously reported as c.793delA                                                                                                                                                         |
| 10   | c.803C>G   | p.(Thr268Arg)      | Missense      | Variant of unknown significance | (Cao et al., 2016)                                                                                                                   |                                                                                                                                                                                          |
| 10   | c.806C>A   | p.(Ser269Tyr)      | Missense      | Likely pathogenic               | (Montagna et al., 2006; van der Knaap et al., 2012)                                                                                  | Previously reported as c.805C>A. Functional experiments show reduction in protein levels and plasma membrane expression (Montagna et al., 2006)                                          |
| 10   | c.809C>G   | p.(Pro270Arg)      | Missense      | Variant of unknown significance | (Shukla et al., 2011; van der Knaap et al., 2012)                                                                                    |                                                                                                                                                                                          |
| 10   | c.812T>C   | p.(Leu271Pro)      | Missense      | Variant of unknown significance | (Cao et al., 2016)                                                                                                                   |                                                                                                                                                                                          |
| 10   | c.821C>T   | p.(Thr274Ile)      | Missense      | Likely pathogenic               | (Yis et al., 2010; van der Knaap et al., 2012)                                                                                       |                                                                                                                                                                                          |

|    |              |                     |            |                                   |                                                                                                                                     |                                                                                                                                    |
|----|--------------|---------------------|------------|-----------------------------------|-------------------------------------------------------------------------------------------------------------------------------------|------------------------------------------------------------------------------------------------------------------------------------|
| 10 | c.823G>A     | p.(Ala275Thr)       | Missense   | Pathogenic                        | (Wang et al., 2011; van der Knaap et al., 2012)                                                                                     |                                                                                                                                    |
| 10 | c.824C>A     | p.(Ala275Asp)       | Missense   | Pathogenic                        | (Montagna et al., 2006; van der Knaap et al., 2012; Shimada et al., 2014; Masuda et al., 2015; Cao et al., 2016; Choi et al., 2017) | Previously reported as c.823C>A and p.Ala275Asn. Discussed in section 3.1                                                          |
| 10 | c.831_838dup | p.(Ser280Tyrfs*8)   | Frameshift | Likely pathogenic                 | (Amin et al., 2022)                                                                                                                 | Previously reported as c.831_838dupATATCTGT                                                                                        |
| 10 | c.832T>C     | p.(Tyr278His)       | Missense   | Variation of unknown significance | (Wang et al., 2011; van der Knaap et al., 2012)                                                                                     |                                                                                                                                    |
| 10 | c.833A>G     | p.(Tyr278Cys)       | Missense   | Likely pathogenic                 | This paper                                                                                                                          |                                                                                                                                    |
| 10 | c.836T>C     | p.(Leu279Pro)       | Missense   | Variation of unknown significance | This paper                                                                                                                          |                                                                                                                                    |
| 10 | c.839C>T     | p.(Ser280Leu)       | Missense   | Pathogenic                        | (Leegwater et al., 2001; van der Knaap et al., 2012)                                                                                | Functional experiments show severe reduction in plasma membrane expression (Teijido et al., 2004; Duarri et al., 2008)             |
| 10 | c.849del     | p.(Met284*)         | Frameshift | Pathogenic                        | (Patrono et al., 2003; van der Knaap et al., 2012)                                                                                  | Previously reported as c.848delC                                                                                                   |
| 10 | c.878-879del | p.(Tyr293Serfs*108) | Frameshift | Likely pathogenic                 | This paper                                                                                                                          | Previously reported as c.878-879delAC                                                                                              |
| 10 | c.880C>T     | p.(Pro294Ser)       | Missense   | Pathogenic                        | (Patrono et al., 2003; van der Knaap et al., 2012; Mahmoud et al., 2014)                                                            |                                                                                                                                    |
| 10 | c.881C>T     | p.(Pro294Leu)       | Missense   | Pathogenic                        | (Cao et al., 2016; Amin et al., 2022)                                                                                               | Functional experiments show strongly reduced protein levels (plasma membrane expression could not be tested) (Duarri et al., 2008) |

|       |                       |                      |                        |                                 |                                                                                                                                              |                                                          |
|-------|-----------------------|----------------------|------------------------|---------------------------------|----------------------------------------------------------------------------------------------------------------------------------------------|----------------------------------------------------------|
| IVS10 | c.894+585_894+1024del | p.?                  | Intronic deletion      | Variant of unknown significance | This paper                                                                                                                                   | Discussed in section 3.1.3                               |
| IVS10 | c.894+5G>A            | p.?                  | Splice defect          | Likely pathogenic               | This paper                                                                                                                                   |                                                          |
| IVS10 | c.894+5G>C            | p.?                  | Splice defect          | Pathogenic                      | This paper                                                                                                                                   |                                                          |
| 10    | Exon 10 del           |                      | In frame deletion      | Variant of unknown significance | This paper                                                                                                                                   | MLPA                                                     |
| IVS10 | c.895-1G>A            | p.?                  | Splice defect          | Likely pathogenic               | (Cao et al., 2016)                                                                                                                           |                                                          |
| IVS10 | c.895-1G>C            | p.?                  | Splice defect          | Likely pathogenic               | (van der Knaap et al., 2012)                                                                                                                 |                                                          |
| IVS10 | c.895-1G>T            | p.?                  | Splice defect          | Likely pathogenic               | This paper                                                                                                                                   | Discussed in section 3.1.1                               |
| IVS10 | c.895-2A>G            | p.?                  | Splice defect          | Likely pathogenic               | (Leegwater et al., 2001; van der Knaap et al., 2012)                                                                                         |                                                          |
| IVS10 | c.895-226T>G          | p.?                  | Intronic/splice defect | Variant of unknown significance | (Mancini et al., 2012; van der Knaap et al., 2012)                                                                                           |                                                          |
| 11+12 | r.895_*2192del        | p.(Pro299_Glu353del) | Deletion               | Pathogenic                      | This paper                                                                                                                                   | MLPA                                                     |
| 11    | Exon 11-Exon 12 del   |                      | Frameshift             | Pathogenic                      | (Boor et al., 2006)                                                                                                                          | Previously reported as g.240706_251959del, MLPA          |
| 11    | c.905A>T              | p.(Asp302Val)        | Missense               | Variant of unknown significance | This paper                                                                                                                                   |                                                          |
| 11    | c.908_918delinsGCA    | p.(Val303Glyfs*96)   | Frameshift             | Pathogenic                      | (Leegwater et al., 2001; Rubie et al., 2003; Yuzbasioglu et al., 2011; Mahmoud et al., 2014; Abdel-Salam et al., 2016; Brozova et al., 2019) | Discussed in section 3.1                                 |
| 11    | c.912_935del          | p.(Leu307_Leu314del) | In frame deletion      | Variant of unknown significance | (Wang et al., 2011; van der Knaap et al., 2012; Cao et al., 2016)                                                                            | Previously reported as c.907_930del / p.Val303_Leu310del |

|    |                           |                      |                         |                                    |                                                                                                   |                                                                                                                                                                                                                    |
|----|---------------------------|----------------------|-------------------------|------------------------------------|---------------------------------------------------------------------------------------------------|--------------------------------------------------------------------------------------------------------------------------------------------------------------------------------------------------------------------|
| 11 | c.921_929dupGCTGC<br>TGCT | p.(Leu308_Leu310dup) | In frame<br>duplication | Variant of unknown<br>significance | (Montagna et al., 2006;<br>Abdel-Salam et al.,<br>2016; Cao et al., 2016)                         |                                                                                                                                                                                                                    |
| 11 | c.924_929dup              | p.(Leu309_Leu310dup) | In frame<br>duplication | Variant of unknown<br>significance | (Abdel-Salam et al.,<br>2016; Cao et al., 2016)                                                   | Previously reported as<br>c.929_930dupGCTGCT and<br>c.929_930insGCTGCT                                                                                                                                             |
| 11 | c.924_929del              | p.(Leu309_Leu310del) | In frame deletion       | Variant of unknown<br>significance | (Bugiani et al., 2003;<br>Rubie et al., 2003; van<br>der Knaap et al., 2012)                      | Previously reported as c1026-<br>1031delTGCTGC and<br>c.1025_1030del. Functional<br>experiments show mildly reduced<br>protein levels (plasma membrane<br>expression could not be tested)<br>(Duarri et al., 2008) |
| 11 | c.927_929dup              | p.(Leu310dup)        | In frame<br>duplication | Likely pathogenic                  | (Montagna et al., 2006;<br>Abdel-Salam et al.,<br>2016; Cao et al., 2016)                         | Previously reported as<br>c.929insGCT. Functional<br>experiments show reduction in<br>protein levels and plasma<br>membrane expression (Montagna<br>et al., 2006)                                                  |
| 11 | c.959C>A                  | p.(Thr320Lys)        | Missense                | Likely pathogenic                  | (Boor et al., 2006;<br>Shukla et al., 2011; van<br>der Knaap et al., 2012;<br>Ilyas et al., 2020) |                                                                                                                                                                                                                    |
| 11 | c.962delG                 | p.(Gly321Alafs*39)   | Frameshift              | Likely pathogenic                  | (Cao et al., 2016)                                                                                |                                                                                                                                                                                                                    |
| 11 | c.971T>G                  | p.(Ile324Ser)        | Missense                | Variant of unknown<br>significance | (Amin et al., 2022)                                                                               |                                                                                                                                                                                                                    |
| 11 | c.976T>C                  | p.(Cys326Arg)        | Missense                | Pathogenic                         | (Leegwater et al., 2002;<br>van der Knaap et al.,<br>2012; Kariminejad et al.,<br>2015)           | Functional experiments show<br>severe reduction in plasma<br>membrane expression (Teijido et<br>al., 2004; Duarri et al., 2008)                                                                                    |
| 11 | c.979G>C                  | p.(Val327Leu)        | Missense                | Variant of unknown<br>significance | This paper                                                                                        |                                                                                                                                                                                                                    |
| 11 | c.985_987del              | p.(Phe329del)        | In frame deletion       | Variant of unknown<br>significance | This paper                                                                                        | Previously reported as<br>c.985_987delTTC                                                                                                                                                                          |

|       |                   |     |               |                   |                                                            |  |
|-------|-------------------|-----|---------------|-------------------|------------------------------------------------------------|--|
| IVS11 | c.1059+1G>A       | p.? | Splice defect | Likely pathogenic | This paper                                                 |  |
| IVS11 | c.1060-2A>G       | p.? | Splice defect | Likely pathogenic | (Leegwater et al., 2001;<br>van der Knaap et al.,<br>2012) |  |
| 4-9   | Exon 4-Exon 9 del | p.? | Deletion      | Pathogenic        | (Cao et al., 2016)                                         |  |
